# Supplementary material for: Serum microRNA Profiles and Pathways in Hepatitis B-Associated Hepatocellular Carcinoma: A South African Study
Source: MDPI journal article supplement (doi:10.3390/ijms25020975), 2024-01-12
Supplement: s1 [file s1]

**Supplementary Table S1: HCC serum miRNA Characterized/mappable UMI >1**

| miRNA           | Base mean | log2FC   | Std error | statistic | p-value  | p-adj    |
|-----------------|-----------|----------|-----------|-----------|----------|----------|
| hsa-miR-373-3p  | 5.719696  | 8.42231  | 0.883551  | 6.14653   | 7.92E-10 | 6.81E-09 |
| hsa-miR-122-3p  | 15.14987  | 6.65198  | 0.732586  | 9.509009  | 1.92E-21 | 5.55E-20 |
| hsa-miR-3591-5p | 10.46715  | 6.466475 | 0.76204   | 8.54514   | 1.28E-17 | 2.33E-16 |
| hsa-miR-1290    | 9.37994   | 6.375868 | 0.760523  | 7.381123  | 1.57E-13 | 1.83E-12 |
| hsa-miR-665     | 20.96892  | 6.247295 | 0.939978  | 23.91597  | 0        | 1E-123   |
| hsa-miR-4488    | 29.87861  | 5.619053 | 0.581307  | 9.767734  | 1.55E-22 | 5.06E-21 |
| hsa-miR-4492    | 5.310284  | 5.528107 | 0.796688  | 6.995202  | 2.65E-12 | 2.84E-11 |
| hsa-miR-296-3p  | 16.21069  | 5.480001 | 0.599385  | 9.074058  | 1.15E-19 | 2.68E-18 |
| hsa-miR-127-5p  | 14.3652   | 5.291995 | 1.015118  | 5.260875  | 1.43E-07 | 8.78E-07 |
| hsa-miR-4532    | 3698.692  | 5.142918 | 0.335717  | 15.32154  | 0        | 5.38E-51 |
| hsa-miR-483-5p  | 44961.15  | 4.885663 | 0.323756  | 15.09255  | 0        | 1.48E-49 |
| hsa-miR-455-5p  | 2.782882  | 4.60887  | 0.861528  | 5.399754  | 6.67E-08 | 4.3E-07  |
| hsa-miR-6087    | 298.347   | 4.605506 | 0.283789  | 16.22821  | 0        | 7.81E-57 |
| hsa-miR-7704    | 7.803728  | 4.503588 | 0.824031  | 5.452906  | 4.96E-08 | 3.28E-07 |
| hsa-miR-1246    | 693.339   | 4.428349 | 0.282388  | 15.6819   | 0        | 2.46E-53 |
| hsa-miR-4497    | 2.765307  | 4.312048 | 1.147763  | 3.466027  | 0.000528 | 0.001823 |
| hsa-miR-1247-5p | 15.98426  | 4.226732 | 0.785575  | 5.372836  | 7.75E-08 | 4.93E-07 |
| hsa-miR-3194-5p | 2.340388  | 4.091444 | 1.088568  | 3.658828  | 0.000253 | 0.000955 |
| hsa-miR-412-5p  | 3.453552  | 4.070963 | 1.091257  | 3.787424  | 0.000152 | 0.000606 |
| hsa-miR-512-3p  | 4.751975  | 4.070027 | 1.272652  | 3.102243  | 0.001921 | 0.005738 |
| hsa-miR-433-3p  | 2.734157  | 4.068241 | 1.195951  | 3.181692  | 0.001464 | 0.004456 |
| hsa-miR-483-3p  | 570.5936  | 3.935395 | 0.302586  | 13.00646  | 1.12E-38 | 6.31E-37 |
| hsa-miR-494-3p  | 102.4987  | 3.808545 | 0.427589  | 8.907558  | 5.22E-19 | 1.07E-17 |
| hsa-miR-320c    | 3978.861  | 3.708797 | 0.234175  | 15.83808  | 0        | 2.78E-54 |
| hsa-miR-3180-3p | 4.47244   | 3.432165 | 1.298102  | 2.876611  | 0.00402  | 0.01059  |
| hsa-miR-887-3p  | 1.510252  | 3.269586 | 1.069255  | 3.065509  | 0.002173 | 0.006376 |
| hsa-miR-323a-3p | 22.22943  | 3.233736 | 0.509258  | 4.612819  | 3.97E-06 | 1.95E-05 |
| hsa-miR-4516    | 138.9756  | 3.165472 | 0.242077  | 13.07597  | 0        | 3.16E-37 |
| hsa-miR-452-5p  | 27.88144  | 3.108166 | 0.421811  | 7.36337   | 1.79E-13 | 2.04E-12 |
| hsa-miR-663a    | 1.563521  | 3.049184 | 1.221206  | 2.612142  | 0.008998 | 0.021826 |
| hsa-miR-3180    | 3.461276  | 2.998256 | 1.314113  | 2.571372  | 0.01013  | 0.024212 |
| hsa-miR-365a-3p | 2.806654  | 2.933892 | 0.80204   | 3.629171  | 0.000284 | 0.001055 |
| hsa-miR-9-3p    | 21.01147  | 2.829662 | 0.49781   | 5.681111  | 1.34E-08 | 1.06E-07 |
| hsa-miR-885-5p  | 17.12898  | 2.806151 | 0.536965  | 5.222057  | 1.77E-07 | 1.06E-06 |
| hsa-miR-885-3p  | 17.9859   | 2.750249 | 0.568132  | 4.839828  | 1.3E-06  | 6.77E-06 |
| hsa-miR-34a-5p  | 132.7026  | 2.710635 | 0.208432  | 13.00413  | 1.16E-38 | 6.31E-37 |
| hsa-miR-1303    | 1.193861  | 2.681309 | 1.018455  | 2.605043  | 0.009186 | 0.022174 |
| hsa-miR-429     | 7.153858  | 2.67148  | 0.716214  | 3.725674  | 0.000195 | 0.000746 |
| hsa-miR-136-3p  | 12.22469  | 2.617716 | 0.662839  | 3.947409  | 7.9E-05  | 0.000337 |

|                   |          |          |          |          |          |          |
|-------------------|----------|----------|----------|----------|----------|----------|
| hsa-miR-130b-3p   | 344.0793 | 2.579866 | 0.209296 | 12.32628 | 6.54E-35 | 2.91E-33 |
| hsa-miR-192-5p    | 2452.268 | 2.537629 | 0.202326 | 12.54233 | 4.38E-36 | 2.15E-34 |
| hsa-miR-320d      | 395.0843 | 2.508955 | 0.220255 | 11.39128 | 4.62E-30 | 1.89E-28 |
| hsa-miR-210-3p    | 49.77771 | 2.449662 | 0.328359 | 7.459668 | 8.67E-14 | 1.06E-12 |
| hsa-miR-218-5p    | 1.089152 | 2.441803 | 1.002239 | 2.398495 | 0.016463 | 0.037174 |
| hsa-miR-874-3p    | 37.20805 | 2.369551 | 0.338818 | 6.991942 | 2.71E-12 | 2.84E-11 |
| hsa-miR-122-5p    | 65595.74 | 2.135302 | 0.229412 | 9.307842 | 1.3E-20  | 3.36E-19 |
| hsa-miR-365b-3p   | 5.442416 | 2.100319 | 0.62992  | 3.326733 | 0.000879 | 0.002851 |
| hsa-miR-200b-3p   | 11.29843 | 2.0396   | 0.568542 | 3.585751 | 0.000336 | 0.001229 |
| hsa-miR-320b      | 1244.831 | 2.018994 | 0.212063 | 9.52082  | 1.72E-21 | 5.26E-20 |
| hsa-miR-625-3p    | 154.9778 | -0.50358 | 0.145735 | -3.45542 | 0.000549 | 0.001844 |
| hsa-miR-15a-5p    | 583.2931 | -0.51479 | 0.136678 | -3.76647 | 0.000166 | 0.000654 |
| hsa-miR-140-3p    | 710.4365 | -0.53017 | 0.114606 | -4.626   | 3.73E-06 | 1.86E-05 |
| hsa-miR-16-5p     | 57609.45 | -0.54342 | 0.144709 | -3.75528 | 0.000173 | 0.000673 |
| hsa-miR-301a-3p   | 5.980979 | -0.54993 | 0.451827 | -3.08362 | 0.002045 | 0.006073 |
| hsa-miR-664a-5p   | 76.86328 | -0.55188 | 0.16317  | -3.38219 | 0.000719 | 0.002381 |
| hsa-miR-363-3p    | 152.478  | -0.56381 | 0.148664 | -3.79246 | 0.000149 | 0.000599 |
| hsa-miR-26b-5p    | 3497.34  | -0.56674 | 0.101464 | -5.58564 | 2.33E-08 | 1.7E-07  |
| hsa-miR-191-5p    | 2691.166 | -0.56905 | 0.094282 | -6.03567 | 1.58E-09 | 1.31E-08 |
| hsa-miR-125a-5p   | 896.9981 | -0.57093 | 0.114116 | -5.00304 | 5.64E-07 | 3.07E-06 |
| hsa-let-7g-5p     | 1025.99  | -0.57368 | 0.091575 | -8.71229 | 2.98E-18 | 5.61E-17 |
| hsa-miR-223-5p    | 203.6451 | -0.58666 | 0.134846 | -4.35059 | 1.36E-05 | 6.34E-05 |
| hsa-miR-145-5p    | 23.97402 | -0.59778 | 0.253434 | -2.35847 | 0.01835  | 0.040871 |
| hsa-miR-126-3p    | 9528.341 | -0.60831 | 0.107886 | -5.63846 | 1.72E-08 | 1.31E-07 |
| hsa-miR-181a-2-3p | 26.29231 | -0.61605 | 0.223112 | -2.76093 | 0.005764 | 0.014558 |
| hsa-miR-106b-3p   | 129.9557 | -0.62932 | 0.153457 | -4.10091 | 4.12E-05 | 0.000182 |
| hsa-miR-199b-3p   | 249.7963 | -0.66604 | 0.105225 | -6.32965 | 2.46E-10 | 2.23E-09 |
| hsa-miR-17-5p     | 36.72098 | -0.67313 | 0.204681 | -4.75617 | 1.97E-06 | 9.97E-06 |
| hsa-miR-199a-3p   | 2657.206 | -0.67339 | 0.097297 | -6.92098 | 4.49E-12 | 4.4E-11  |
| hsa-miR-2110      | 15.32545 | -0.67786 | 0.259293 | -2.61384 | 0.008953 | 0.021826 |
| hsa-miR-339-5p    | 138.1395 | -0.6925  | 0.124057 | -5.58213 | 2.38E-08 | 1.71E-07 |
| hsa-miR-584-5p    | 404.9096 | -0.6978  | 0.131478 | -5.30734 | 1.11E-07 | 6.9E-07  |
| hsa-miR-151a-3p   | 1234.377 | -0.73369 | 0.110309 | -6.6512  | 2.91E-11 | 2.79E-10 |
| hsa-miR-409-3p    | 129.1007 | -0.77119 | 0.211625 | -3.64405 | 0.000268 | 0.001004 |
| hsa-miR-324-3p    | 16.12407 | -0.78378 | 0.261078 | -3.00179 | 0.002684 | 0.007558 |
| hsa-miR-182-5p    | 273.3272 | -0.81254 | 0.169072 | -4.80583 | 1.54E-06 | 7.95E-06 |
| hsa-miR-190a-5p   | 187.2302 | -0.82153 | 0.153502 | -5.35187 | 8.7E-08  | 5.47E-07 |
| hsa-miR-454-3p    | 96.08897 | -0.8852  | 0.159384 | -5.55372 | 2.8E-08  | 1.93E-07 |
| hsa-let-7b-5p     | 17716.19 | -0.88964 | 0.155153 | -5.73395 | 9.81E-09 | 7.88E-08 |
| hsa-miR-146a-5p   | 6559.699 | -0.90415 | 0.107412 | -8.41761 | 3.84E-17 | 6.72E-16 |
| hsa-let-7i-5p     | 9798.911 | -0.92264 | 0.112125 | -8.22864 | 1.89E-16 | 3.2E-15  |

|                          |          |          |          |          |          |          |
|--------------------------|----------|----------|----------|----------|----------|----------|
| hsa-miR-25-5p            | 6.84924  | -0.95195 | 0.417757 | -2.27718 | 0.022775 | 0.049599 |
| hsa-miR-181a-3p          | 12.89554 | -0.96086 | 0.289184 | -3.32203 | 0.000894 | 0.002881 |
| hsa-let-7d-5p            | 902.5911 | -0.97507 | 0.1274   | -7.65358 | 1.95E-14 | 2.9E-13  |
| hsa-miR-1277-5p          | 30.42358 | -0.98986 | 0.253285 | -3.90761 | 9.32E-05 | 0.000387 |
| hsa-miR-3138             | 5.839791 | -1.00125 | 0.405343 | -2.46846 | 0.01357  | 0.03107  |
| hsa-miR-744-5p           | 221.4047 | -1.02964 | 0.116393 | -8.84621 | 9.05E-19 | 1.77E-17 |
| hsa-miR-139-3p           | 53.08787 | -1.03265 | 0.187239 | -5.5151  | 3.49E-08 | 2.37E-07 |
| hsa-miR-425-5p           | 1124.783 | -1.04312 | 0.106034 | -9.83762 | 7.75E-23 | 2.71E-21 |
| hsa-miR-140-5p           | 35.30478 | -1.0457  | 0.200346 | -5.21905 | 1.8E-07  | 1.06E-06 |
| hsa-miR-16-2-3p          | 9.724804 | -1.05514 | 0.413007 | -2.55315 | 0.010675 | 0.025149 |
| hsa-miR-191-3p           | 6.593383 | -1.07549 | 0.410798 | -2.61571 | 0.008904 | 0.021815 |
| hsa-miR-155-5p           | 161.2596 | -1.129   | 0.147754 | -7.64098 | 2.16E-14 | 3E-13    |
| hsa-miR-576-5p           | 23.6236  | -1.14706 | 0.279315 | -4.1059  | 4.03E-05 | 0.000179 |
| hsa-let-7a-5p            | 13460.63 | -1.15588 | 0.129421 | -8.93112 | 4.22E-19 | 8.98E-18 |
| hsa-miR-485-3p           | 13.92268 | -1.15618 | 0.448428 | -2.577   | 0.009966 | 0.023938 |
| hsa-miR-196b-5p          | 61.10851 | -1.19579 | 0.218811 | -5.46457 | 4.64E-08 | 3.11E-07 |
| hsa-miR-590-3p           | 10.71471 | -1.21073 | 0.395937 | -3.05615 | 0.002242 | 0.006462 |
| hsa-miR-1273h-3p         | 8.081063 | -1.21756 | 0.366892 | -3.31737 | 0.000909 | 0.00291  |
| hsa-miR-628-3p           | 22.36768 | -1.21775 | 0.286407 | -4.2509  | 2.13E-05 | 9.66E-05 |
| hsa-miR-671-3p           | 6.135155 | -1.21877 | 0.401113 | -3.03649 | 0.002393 | 0.006779 |
| hsa-miR-93-3p            | 8.556188 | -1.23017 | 0.41457  | -2.96542 | 0.003023 | 0.008321 |
| hsa-let-7f-5p            | 13136.22 | -1.23639 | 0.131157 | -9.42677 | 4.23E-21 | 1.15E-19 |
| hsa-miR-98-5p            | 157.1162 | -1.25714 | 0.180782 | -6.95381 | 3.56E-12 | 3.56E-11 |
| hsa-miR-142-3p           | 7768.964 | -1.27476 | 0.142683 | -8.9342  | 4.1E-19  | 8.98E-18 |
| hsa-miR-139-5p           | 8.746202 | -1.28118 | 0.411129 | -3.11468 | 0.001841 | 0.00557  |
| hsa-miR-625-5p           | 16.94864 | -1.29471 | 0.295801 | -4.37571 | 1.21E-05 | 0.000057 |
| hsa-miR-103b             | 115.6996 | -1.30687 | 0.186929 | -6.9911  | 2.73E-12 | 2.84E-11 |
| hsa-miR-942-5p           | 21.72541 | -1.30841 | 0.260941 | -5.01311 | 5.36E-07 | 2.95E-06 |
| hsa-miR-4433b-5p         | 150.3544 | -1.31484 | 0.203117 | -6.47325 | 9.59E-11 | 9.04E-10 |
| hsa-miR-96-5p            | 21.83946 | -1.31659 | 0.350166 | -3.75884 | 0.000171 | 0.000669 |
| hsa-let-7e-5p            | 377.3285 | -1.31941 | 0.131706 | -10.0178 | 1.27E-23 | 4.8E-22  |
| hsa-miR-451a             | 2597.215 | -1.32522 | 0.17326  | -7.64873 | 2.03E-14 | 2.93E-13 |
| hsa-miR-342-5p           | 2.021495 | -1.33869 | 0.718251 | -3.71807 | 0.000201 | 0.000763 |
| hsa-miR-4732-3p          | 12.86058 | -1.36548 | 0.39145  | -3.48652 | 0.000489 | 0.001738 |
| hsa-miR-548ap-5p/548j-5p | 20.61347 | -1.37234 | 0.271288 | -5.05771 | 4.24E-07 | 2.36E-06 |
| hsa-miR-4286             | 5.534063 | -1.41695 | 0.43919  | -3.22268 | 0.00127  | 0.003889 |
| hsa-miR-451b             | 10.15125 | -1.42581 | 0.4099   | -3.47637 | 0.000508 | 0.001779 |
| hsa-miR-411-5p           | 5.666008 | -1.43274 | 0.507337 | -2.81995 | 0.004803 | 0.012452 |
| hsa-miR-6852-3p          | 6.643046 | -1.45449 | 0.419476 | -3.46383 | 0.000533 | 0.001825 |
| hsa-miR-335-3p           | 3.739216 | -1.48443 | 0.52658  | -2.81304 | 0.004908 | 0.012657 |
| hsa-miR-1294             | 7.697929 | -1.49805 | 0.509521 | -2.93668 | 0.003317 | 0.008981 |

|                      |          |          |          |          |          |          |
|----------------------|----------|----------|----------|----------|----------|----------|
| hsa-miR-185-3p       | 18.01138 | -1.50062 | 0.306935 | -4.88778 | 1.02E-06 | 5.37E-06 |
| hsa-miR-6842-3p      | 1.977057 | -1.50347 | 0.604155 | -2.4817  | 0.013076 | 0.03008  |
| hsa-miR-1908-5p      | 7.18873  | -1.52378 | 0.393941 | -3.86606 | 0.000111 | 0.000452 |
| hsa-miR-26b-3p       | 3.373266 | -1.55304 | 0.50865  | -3.04681 | 0.002313 | 0.006627 |
| hsa-miR-29c-5p       | 8.660549 | -1.55355 | 0.380551 | -4.08009 | 4.5E-05  | 0.000197 |
| hsa-miR-1976         | 4.203916 | -1.56448 | 0.484142 | -3.22576 | 0.001256 | 0.003872 |
| hsa-miR-190b         | 10.17143 | -1.56522 | 0.38823  | -4.02902 | 5.6E-05  | 0.000243 |
| hsa-miR-454-5p       | 2.848485 | -1.59591 | 0.537304 | -2.96316 | 0.003045 | 0.008336 |
| hsa-miR-181d-5p      | 3.621804 | -1.61189 | 0.573539 | -2.80522 | 0.005028 | 0.012832 |
| hsa-miR-130b-5p      | 2.991505 | -1.63975 | 0.547142 | -2.99086 | 0.002782 | 0.007789 |
| hsa-miR-148b-5p      | 1.61401  | -1.64799 | 0.625889 | -2.62472 | 0.008672 | 0.021353 |
| hsa-miR-1255b-5p     | 3.774883 | -1.68579 | 0.598919 | -2.80754 | 0.004992 | 0.012807 |
| hsa-miR-5187-5p      | 4.502203 | -1.71937 | 0.527493 | -3.25518 | 0.001133 | 0.003536 |
| hsa-miR-133a-3p      | 6.810987 | -1.75265 | 0.537881 | -3.25346 | 0.00114  | 0.003536 |
| hsa-miR-151b/151a-5p | 34.03798 | -1.76669 | 0.234114 | -7.54526 | 4.51E-14 | 5.82E-13 |
| hsa-miR-628-5p       | 7.206595 | -1.92744 | 0.42404  | -4.54014 | 5.62E-06 | 0.000027 |
| hsa-miR-6852-5p      | 3.246142 | -1.99026 | 0.557028 | -3.56345 | 0.000366 | 0.001329 |
| hsa-miR-1275         | 7.914462 | -2.00718 | 0.614106 | -3.2634  | 0.001101 | 0.003458 |
| hsa-miR-652-3p       | 13.57694 | -2.02744 | 0.346976 | -5.83979 | 5.23E-09 | 4.27E-08 |
| hsa-miR-221-5p       | 2.419567 | -2.14584 | 0.651715 | -3.28175 | 0.001032 | 0.003261 |
| hsa-miR-664b-5p      | 1.217857 | -2.25105 | 0.811013 | -2.76228 | 0.00574  | 0.014558 |
| hsa-miR-4446-3p      | 1.039214 | -2.40108 | 0.911806 | -2.6265  | 0.008627 | 0.021349 |
| hsa-miR-28-5p        | 1.672849 | -2.44158 | 0.683558 | -3.56109 | 0.000369 | 0.001331 |
| hsa-miR-491-5p       | 3.369957 | -2.48768 | 0.50709  | -4.89557 | 9.8E-07  | 5.22E-06 |
| hsa-miR-4433a-3p     | 7.041239 | -2.66833 | 0.477484 | -5.57951 | 2.41E-08 | 1.71E-07 |
| hsa-miR-505-5p       | 2.826169 | -2.69058 | 0.548359 | -4.89781 | 9.69E-07 | 5.22E-06 |
| hsa-miR-1306-3p      | 1.597574 | -2.7015  | 0.773694 | -3.47774 | 0.000506 | 0.001779 |
